# Supplementary material for: The mediation of the AHR/IL-22/STAT3/IL-6 axis by soft-shelled turtle (Pelodiscus sinensis) peptide and Chinese pond turtle (Chinemys reevesii) peptide contributed to their amelioration effects on intestinal mucosal immunity in immunosuppressed mice
Source: Royal Society of Chemistry journal article supplement (doi:10.1039/d3fo00250k), 2023-01-01

Bands of GAPDH

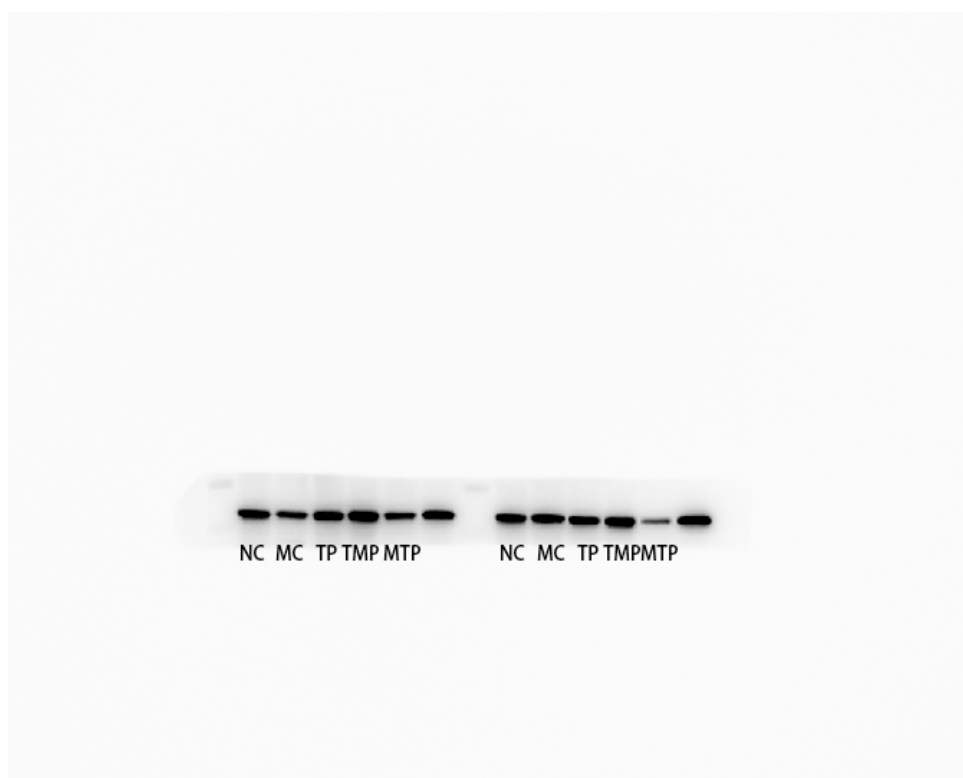

Bands of GAPDH(merged with marker)

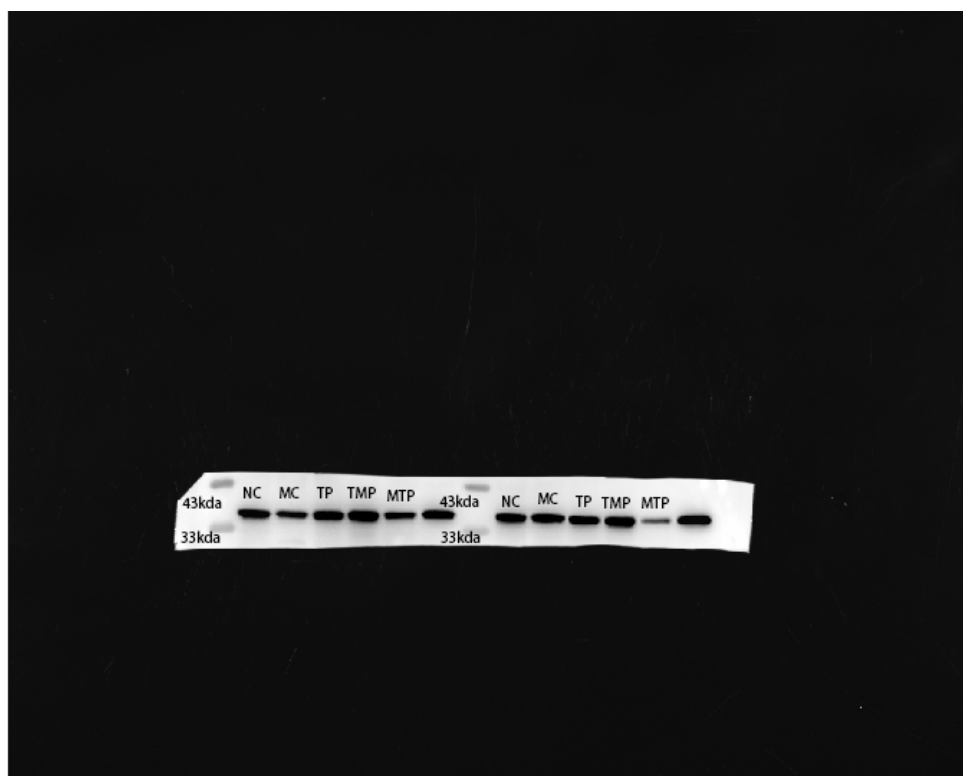

Bands of AHR (the figure of band presented in the manuscript was adjusted the contrast ratio in Image Lab software)

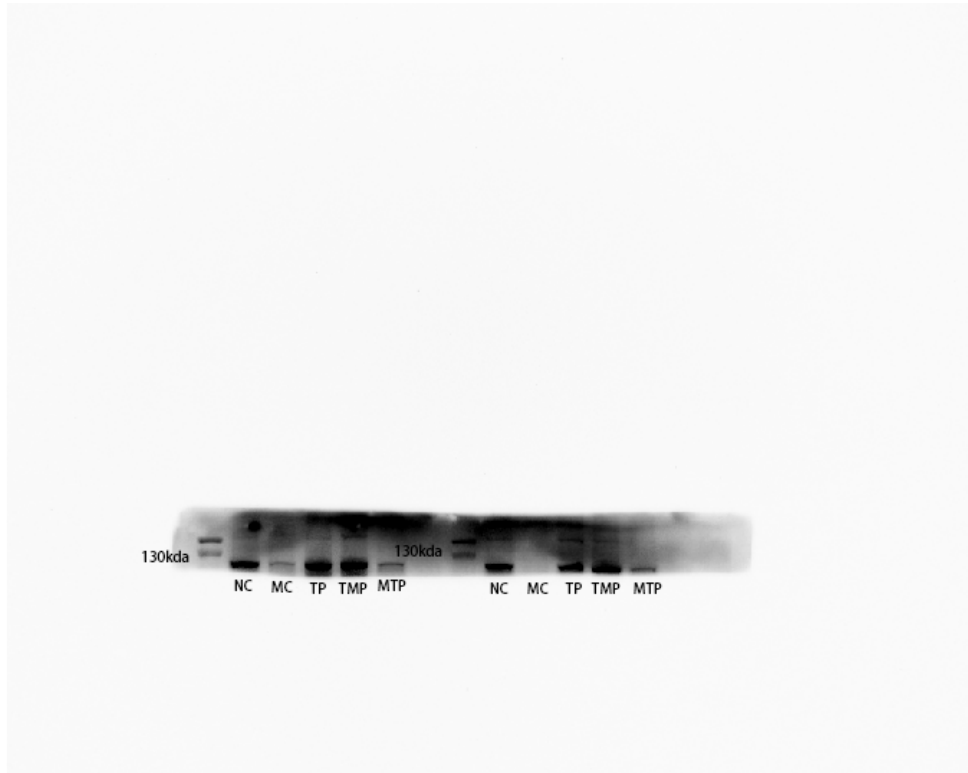

Bands of AHR (merged with marker)

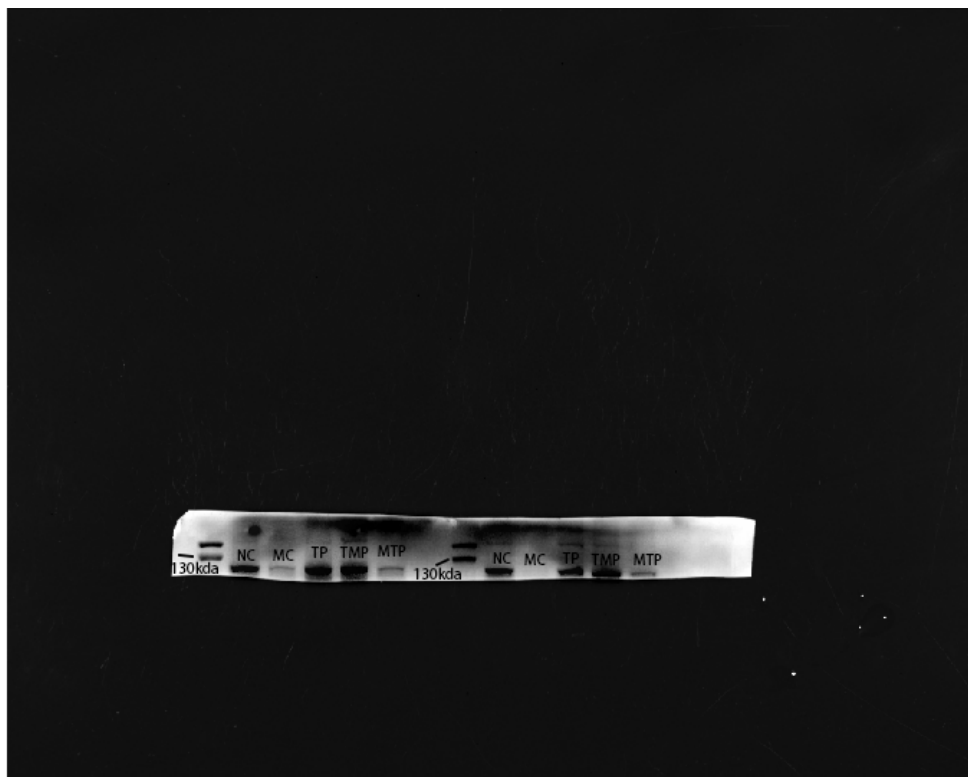

Bands of STAT3

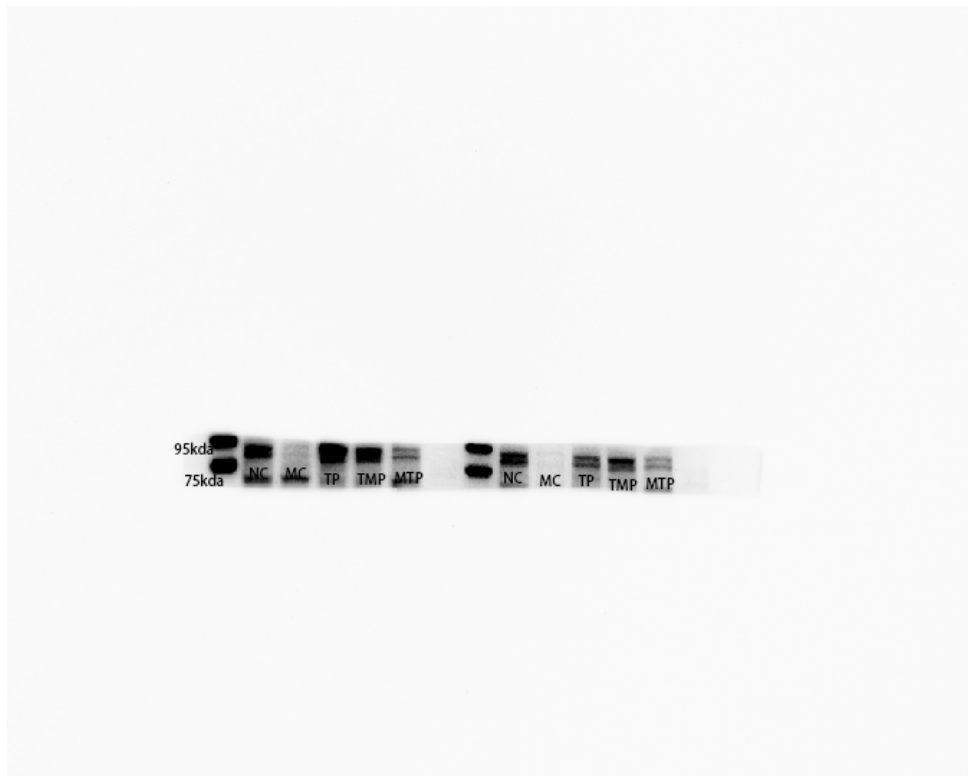

Bands of STAT3(merged with marker)

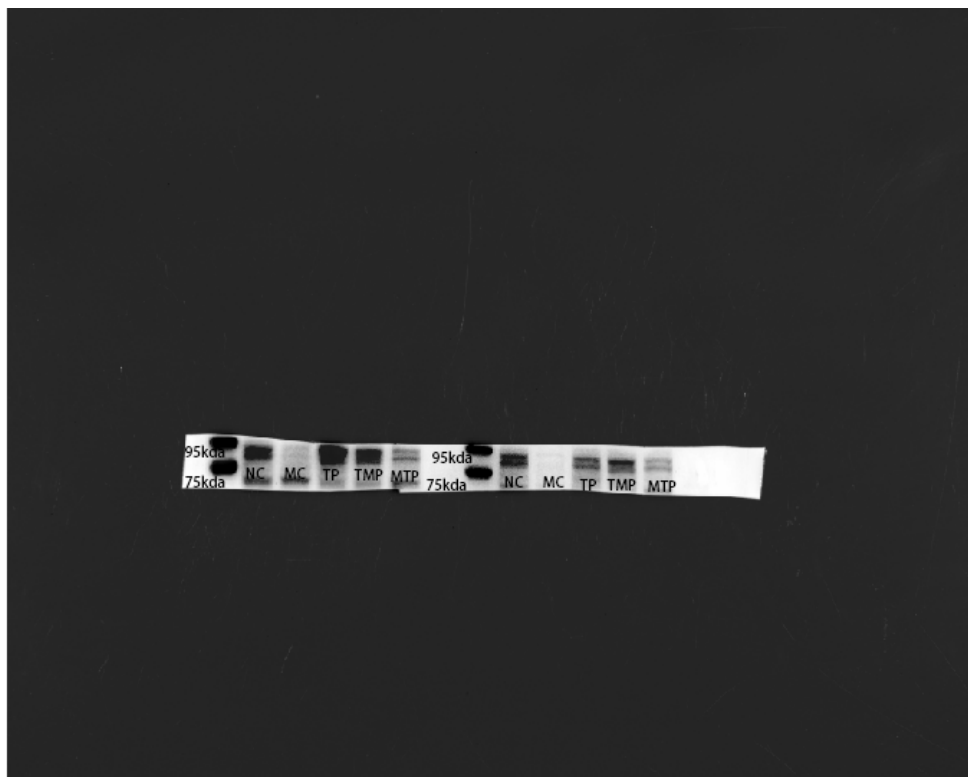

## Bands of pSTAT3

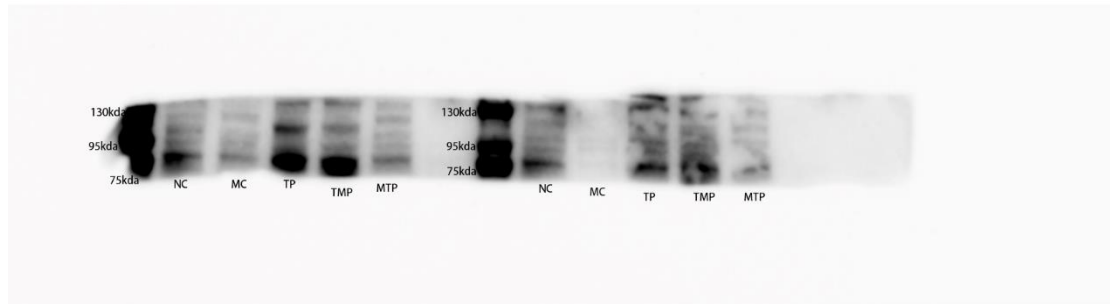

## Bands of pSTAT3 (merged with marker)

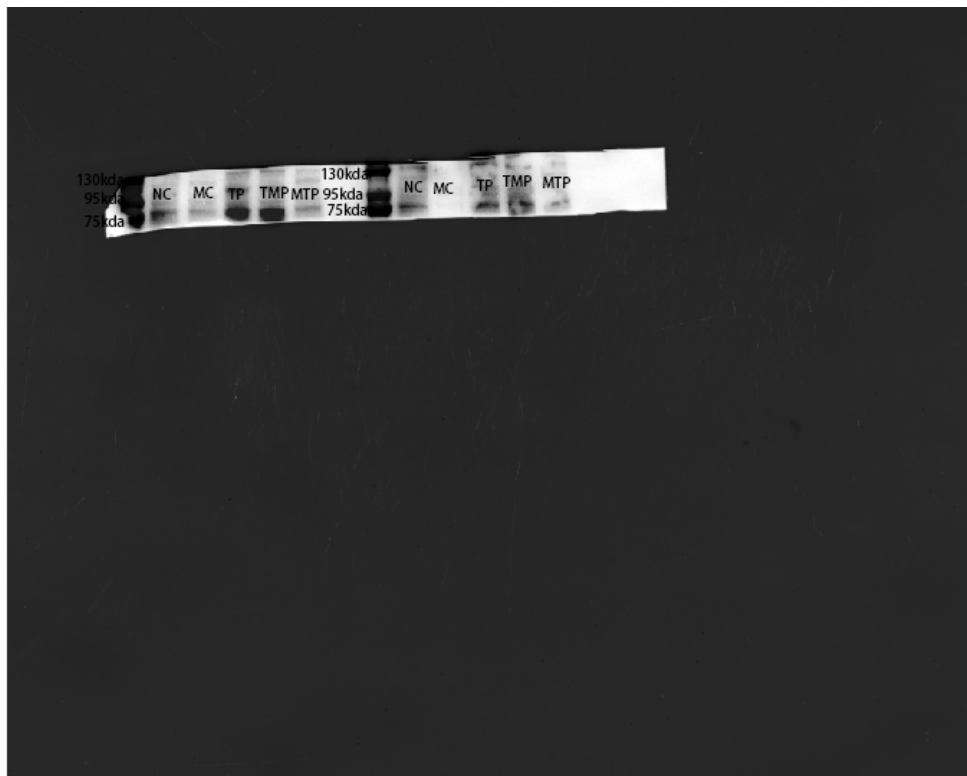

Supplement: d3fo00250k1.pdf [file d3fo00250k1.pdf]
