# Supplementary material for: The mediation of the AHR/IL-22/STAT3/IL-6 axis by soft-shelled turtle (Pelodiscus sinensis) peptide and Chinese pond turtle (Chinemys reevesii) peptide contributed to their amelioration effects on intestinal mucosal immunity in immunosuppressed mice
Source: Royal Society of Chemistry journal article supplement (doi:10.1039/d3fo00250k), 2023-01-01
Supplement: d3fo00250k2.pdf [file d3fo00250k2.pdf]

**Table S1 Peptide sequences containing Tryptophan (W) in TP**

| Peptide sequence <sup>a</sup> | ACL (%) | m/z       | Tryptophan content (%) |
|-------------------------------|---------|-----------|------------------------|
| HWPW                          | 96.9    | 625.28772 | 20                     |
| WLPR                          | 95.4    | 286.17093 | 25                     |
| WGDAGAE                       | 94.6    | 705.2843  | 14.3                   |
| PAWE                          | 94.3    | 502.22995 | 25                     |
| ELWDW                         | 92.9    | 748.3316  | 40                     |
| DWRPPQP                       | 92.8    | 448.22421 | 14.3                   |
| K(+42.01)WAKVESDLPAHGQ        | 92.6    | 804.41241 | 7.1                    |
| T(+42.01)ALPPW                | 91.5    | 363.69446 | 16.7                   |
| LPGDW                         | 90.7    | 587.28217 | 20                     |
| K(+42.01)VSW                  | 89.9    | 561.3028  | 25                     |
| WGLE                          | 89.4    | 504.24451 | 25                     |
| K(+42.01)EWE                  | 89.3    | 633.2879  | 25                     |
| A(+42.01)AGPW                 | 89      | 543.2558  | 20                     |
| PSLPPW                        | 88.4    | 348.68918 | 16.7                   |
| VGGDW                         | 88.2    | 533.23529 | 20                     |
| EWLPPVPL                      | 88.2    | 475.77084 | 12.5                   |
| VLSEW                         | 87.4    | 633.32385 | 20                     |
| PSLPPW                        | 87.3    | 348.68903 | 16.7                   |
| DVGDW                         | 86.1    | 591.24084 | 20                     |
| EVRDVGDW                      | 85.8    | 488.23004 | 12.5                   |
| WLPV                          | 85.7    | 514.30133 | 25                     |
| WDFQ                          | 85.6    | 595.25165 | 25                     |
| ALGGW                         | 84.9    | 503.26166 | 20                     |
| DVLPPW                        | 84.8    | 363.69446 | 16.7                   |
| VGDW                          | 84.2    | 476.21313 | 25                     |
| VGWE                          | 84.2    | 490.22885 | 25                     |
| WDQHLG                        | 84      | 755.34729 | 16.7                   |
| HALLTDWDDMEK                  | 84      | 737.3374  | 8.3                    |
| YPLEHALLTDWDDMEK              | 83.4    | 988.45837 | 6.3                    |
| PLSPPW                        | 82.9    | 348.68918 | 16.7                   |
| GWLE                          | 82.7    | 504.24451 | 25                     |
| A(+42.01)ALPPW                | 81.9    | 348.68918 | 16.7                   |
| NWPW                          | 81.1    | 602.27203 | 50                     |

<sup>a</sup> Peptide sequences were screened based on the criteria of ASL > 80% and Area > 10<sup>6</sup>

**Table S2 Peptide sequences containing Tryptophan (W) in TMP**

| Peptide sequence <sup>a</sup> | ALC (%) | m/z       | Tryptophan content (%) |
|-------------------------------|---------|-----------|------------------------|
| WAPPLK                        | 98.2    | 356.21304 | 16.7                   |
| HFHW                          | 98.1    | 313.64517 | 25                     |
| WLVR                          | 97.8    | 287.17862 | 25                     |
| WLLK                          | 97.8    | 280.18323 | 25                     |
| WLPR                          | 97.6    | 286.17099 | 25                     |
| WEPPLK                        | 97.3    | 385.2157  | 16.7                   |
| WVPVR                         | 96.8    | 328.69736 | 20                     |
| WLLR                          | 96.1    | 294.18692 | 25                     |
| WRPSF                         | 96.1    | 346.67905 | 20                     |
| HWPW                          | 96.1    | 625.2876  | 50                     |
| WQLK                          | 95.9    | 287.67072 | 25                     |
| WQLR                          | 95.9    | 301.67383 | 25                     |
| WLLPR                         | 95.6    | 342.71307 | 20                     |
| NWVPVK                        | 95.2    | 371.71558 | 16.7                   |
| WRPPQP                        | 94.8    | 390.711   | 16.7                   |
| WGDAGAE                       | 94.1    | 705.28436 | 14.3                   |
| WKPPV                         | 94.1    | 313.68665 | 20                     |
| LVVHQN(+0.98)WNSNQLSK         | 94.1    | 834.42828 | 7.1                    |
| PVRPW                         | 93.6    | 327.69107 | 20                     |
| WLLGDV                        | 93.1    | 702.38257 | 16.7                   |
| SYWGSK                        | 93.1    | 727.341   | 16.7                   |
| WGPY                          | 92.9    | 522.23468 | 25                     |
| LPSDW                         | 92.9    | 617.29254 | 20                     |
| KDMW                          | 92.7    | 579.25952 | 25                     |
| WVPSVY                        | 92.2    | 750.38104 | 16.7                   |
| WQLH                          | 92      | 292.15277 | 25                     |
| WEKPF                         | 91.7    | 353.68143 | 20                     |
| WKPPL                         | 91.4    | 320.69412 | 20                     |
| WTGSLN                        | 91.3    | 677.32562 | 16.7                   |
| WNRPPQP                       | 91.2    | 447.73276 | 14.3                   |
| NWVVPR                        | 90.5    | 385.71887 | 16.7                   |
| K(+42.01)VSW                  | 90.4    | 561.30261 | 25                     |
| EGYW                          | 90.3    | 554.22357 | 25                     |
| LSGW                          | 90      | 462.23419 | 25                     |
| ALGGW                         | 89.6    | 503.26041 | 20                     |
| DWRPPQP                       | 89.4    | 448.22406 | 14.3                   |
| WQLT                          | 89.2    | 547.28687 | 25                     |
| WPVH                          | 88.8    | 269.64215 | 25                     |
| WQLTL                         | 88.6    | 660.37146 | 20                     |
| WVVS                          | 88.5    | 490.26578 | 25                     |
| WLTA                          | 88.4    | 490.26578 | 25                     |

*(Continued on next page)*

**Table S2 Peptide sequences containing Tryptophan (W) in TMP (Continued)**

| Peptide sequence <sup>a</sup> | ALC (%) | m/z       | Tryptophan content (%) |
|-------------------------------|---------|-----------|------------------------|
| VGPW                          | 88.4    | 458.23926 | 25                     |
| T(+42.01)ALPPW                | 88.2    | 363.69443 | 16.7                   |
| PSLPPW                        | 88.2    | 348.68909 | 16.7                   |
| PVRWP                         | 88      | 327.69107 | 20                     |
| WTPDSPTLKPHTP                 | 88      | 738.87793 | 7.7                    |
| WVPPVPL                       | 87.8    | 404.24118 | 14.3                   |
| VGGDW                         | 87.5    | 533.23474 | 20                     |
| WEHPF                         | 87.3    | 358.16336 | 20                     |
| N(+42.01)DLLNSQWVVSAAH        | 87.2    | 798.39404 | 7.1                    |
| WQLAL                         | 87      | 630.36084 | 20                     |
| WQLA                          | 86.7    | 517.27643 | 25                     |
| HWPF                          | 86.6    | 586.27679 | 25                     |
| VLSEW                         | 86.6    | 633.32361 | 20                     |
| LLPW                          | 86.4    | 528.31787 | 25                     |
| WGLE                          | 85.6    | 504.24435 | 25                     |
| WRPPGAP                       | 84.9    | 390.711   | 14.3                   |
| WDMPL                         | 84.7    | 661.30176 | 20                     |
| D(+42.01)NLLNSQWVVSAAH        | 84.6    | 798.39404 | 7.1                    |
| NWRPPQP                       | 84.4    | 447.73276 | 14.3                   |
| VDLPPW                        | 84.3    | 363.69443 | 16.7                   |
| PAWE                          | 83.9    | 502.22952 | 25                     |
| WAGL                          | 83.6    | 446.23917 | 25                     |
| NWVPVR                        | 83.1    | 385.71887 | 16.7                   |
| YPWT                          | 83      | 566.26025 | 25                     |
| NWVRVP                        | 83      | 385.71887 | 16.7                   |
| WAPVTQ                        | 82.9    | 351.18433 | 16.7                   |
| K(+42.01)GGW                  | 82.8    | 489.24493 | 25                     |
| EWLPPVPL                      | 82.7    | 475.77023 | 12.5                   |
| GWLE                          | 82.7    | 504.24435 | 25                     |
| HSWPL                         | 82.7    | 639.32489 | 20                     |
| WLPPVPL                       | 82.6    | 411.24896 | 14.3                   |
| YPLEHALLTDWDDMEK              | 82.4    | 988.45441 | 5.9                    |
| WGGY                          | 82.2    | 482.20319 | 25                     |
| EAGFW                         | 81.6    | 609.26556 | 20                     |
| WLVPS                         | 81.4    | 601.33502 | 20                     |
| WGPF                          | 81.1    | 506.23938 | 25                     |
| DVLPPW                        | 81      | 363.69443 | 16.7                   |
| DWLR                          | 80.8    | 295.15823 | 25                     |
| A(+42.01)ALPPW                | 80.8    | 348.68909 | 16.7                   |
| WTPDSPTLKPHEPES               | 80.5    | 796.39172 | 7.1                    |

*(Continued on next page)*

**Table S2 Peptide sequences containing Tryptophan (W) in TMP (Continued)**

| Peptide sequence <sup>a</sup> | ALC (%) | m/z       | Tryptophan content (%) |
|-------------------------------|---------|-----------|------------------------|
| WLPV                          | 80.3    | 514.3017  | 25                     |
| WLLGDVF                       | 80      | 849.44879 | 14.3                   |

<sup>a</sup> Peptide sequences were screened based on the criteria of ASL > 80% and Area > 10<sup>6</sup>

**Table S3. Approximate composition of experimental diet**

| <b>Ingredients (g / 100 g diet)</b>       | <b>Normal chow diet</b> |
|-------------------------------------------|-------------------------|
| Casein                                    | 18.96                   |
| L-Cystine                                 | 0.28                    |
| Corn Starch                               | 29.86                   |
| Maltodextrin                              | 3.32                    |
| Sucrose                                   | 33.17                   |
| Cellulose                                 | 4.74                    |
| Soybean Oil                               | 2.37                    |
| Lard                                      | 1.90                    |
| Mineral Mix                               | 2.68                    |
| Potassium Citrate, 1 H <sub>2</sub> O     | 1.56                    |
| Vitamin Mix                               | 0.95                    |
| Choline Bitartrate                        | 0.19                    |
| Glycerol monocaprylate                    | 0                       |
| <b>Calories supplementation (kcal %)</b>  |                         |
| Proteins                                  | 20                      |
| Carbohydrates                             | 70                      |
| Fats                                      | 10                      |
| <b>Total calories (kcal / 100 g diet)</b> | <b>385.0</b>            |

**Table S4. Information on the primers used in Quantitative Real-time PCR (qPCR)**

| Target gene       | Primer sequence (5' -3' )                                           |
|-------------------|---------------------------------------------------------------------|
| <i>β-actin</i>    | Forward: GTGCTATGTTGCTCTAGACTTCG<br>Reverse: ATGCCACAGGATTCCATACC   |
| <i>Claudin-1</i>  | Forward: GCTTTAGCGAACAGAAGGAGC<br>Reverse: TTCATTTTTCCGAGACTTCACCA  |
| <i>Occludin</i>   | Forward: TGAAAGTCCACCTCCTTACAGA<br>Reverse: CCGGATAAAAAGAGTACGCTGG  |
| <i>E-cadherin</i> | Forward: CAGGTCTCCTCATGGCTTTGC<br>Reverse: CTTCCGAAAAGAAGGCTGTCC    |
| <i>Bcl-6</i>      | Forward: TGAGGTCGTGGAGAACAA<br>Reverse: TCATCAGAGAAGAGGAAGGT        |
| <i>Prdm-1</i>     | Forward: TTTGTGGACAGAGGCCGAGT<br>Reverse: AAAGCGTGTTCCCTTCGGTAT     |
| <i>CD79a</i>      | Forward: CTGTTCTTCCCCGAAGTAAACAA<br>Reverse: CACGCGGAGGTAAGTACCAC   |
| <i>CD79b</i>      | Forward: CCGAGGTTTGCAGCCAAAAG<br>Reverse: CACAATGCGTCCCTCTTCTG      |
| <i>Il22r</i>      | Forward: ATGAAGACACTACTGACCATCCT<br>Reverse: CAGCCACTTTCTCTCTCCGT   |
| <i>Ahr</i>        | Forward: GCTGCTGGTGAGGTTGACTTC<br>Reverse: GCTGTTGCTGTTGCTCTAGTTG   |
| <i>Stat3</i>      | Forward: CACCTTGGATTGAGAGTCAAGAC<br>Reverse: AGGAATCGGCTATATTGCTGGT |
| <i>Aid</i>        | Forward: TCACCTGGTTCACCTCCTGGA<br>Reverse: CTCAGCCTTGCGGTCTTCACA    |
| <i>Tslp</i>       | Forward: GTTCTTCTCAGGAGCCTCTTCA<br>Reverse: GCTGGCTTGCTCTCACAGT     |
| <i>Tlr2</i>       | Forward: CACCACTGCCCGTAGATGAAG<br>Reverse: AGGGTACAGTCGTCGAACTCT    |
| <i>Tlr4</i>       | Forward: ATGGCATGGCTTACACCACC<br>Reverse: GAGGCCAATTTTGTCTCCACA     |
| <i>Myd88</i>      | Forward: TCATGTTCTCCATACCCTTGGT<br>Reverse: AAACTGCGAGTGGGGTCAG     |
| <i>J chain</i>    | Forward: TGACGACGAAGCGACCATTC<br>Reverse: TTCAAAGGGACAACAATTCGGA    |
| <i>pIgR</i>       | Forward: ATGAGGCTCTACTTGTTACGC<br>Reverse: CGCCTTCTATACTACTCACCTCC  |

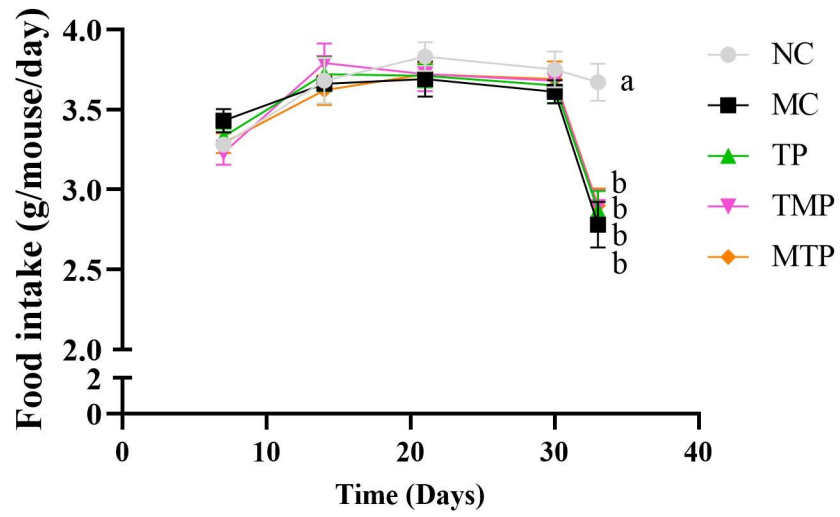

**Fig. S1 Food intake during the experiment.** Data are expressed as mean  $\pm$  SEM,  $n = 3$ . Significant difference between the groups was denoted by different letters ( $P < 0.05$ )
